# Supplementary material
Source: MDPI journal article supplement (https://www.mdpi.com/2673-4079/2/2/22)
Supplement: s1 [file s1]

# Supporting Information

## Removing simultaneously sulfur and nitrogen from fuel under a sustainable oxidative catalytic system

Dinis F. Silva<sup>1§</sup>, Alexandre M. Viana<sup>1§</sup>, Fátima Mirante<sup>1</sup>, Baltazar de Castro<sup>1</sup>,  
Luís Cunha-Silva<sup>1</sup> and Salette S. Balula<sup>1\*</sup>

<sup>1</sup> LAQV / REQUIMTE/LAQV & Department of Chemistry and Biochemistry, Faculty of Sciences, University of Porto, 4169-007 Porto, Portugal; josedinis.silva@fc.up.pt; up201405091@edu.fc.up.pt; fatima.mirante@fc.up.pt; bcastro@fc.up.pt; l.cunha.silva@fc.up.pt

§ These authors contributed equally for the research work.

\* Correspondence: sbalula@fc.up.pt; Tel.: +351220402576

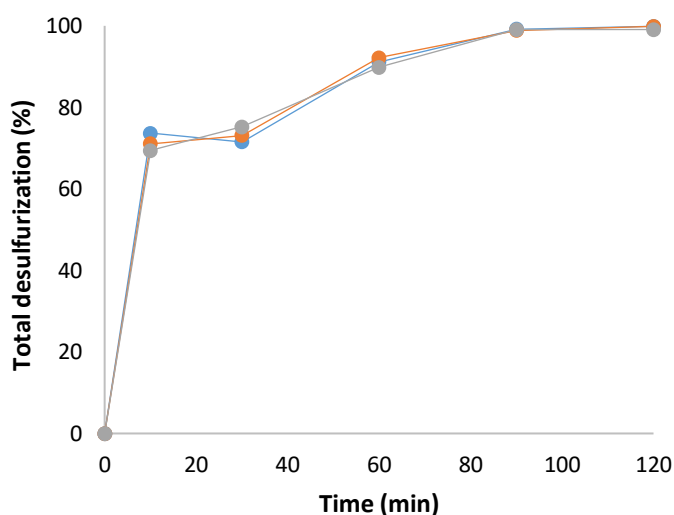

**Figure S1.** Denitrogenation and desulfurization profiles of a combined ODS/ODN process, repeated three times for accuracy investigation, using a single Model Diesel containing BT, DMDBT, MDBT and DBT, QUI and IND, using [Na]PMo<sub>12</sub> catalyst, [BMIM]PF<sub>6</sub> extraction solvent, H<sub>2</sub>O<sub>2</sub> as oxidant, at 70 °C.
